# Supplementary material for: Diet Quality and Breast Cancer Recurrence and Survival: The Pathways Study
Source: PubMed Central journal article supplement — JNCI Cancer Spectr. 2021 Mar 2;5(2):pkab019. doi: 10.1093/jncics/pkab019 (PMC8062847; doi:10.1093/jncics/pkab019), 2021-03-02
Supplement: pkab019_supplementary_data.pdf [file pkab019_supplementary_data.pdf]

## SUPPLEMENTARY TABLES AND FIGURES

Supplementary Table 1. Baseline characteristics and survival outcomes comparing excluded participants with included participants from the Pathways Study. (n=4,505).

| Characteristic                            | Excluded (n=3,660) | Included (n=845) | P     |
|-------------------------------------------|--------------------|------------------|-------|
| Continuous, Mean (SD) <sup>a</sup>        |                    |                  |       |
| Age at diagnosis (years)                  | 56.7 (12.6)        | 59.7 (11.9)      | <.001 |
| Physical activity (MET h/wk) <sup>b</sup> | 54.4 (44.4)        | 53.8 (35.8)      | 0.68  |
| Categorical, No. (%) <sup>c</sup>         |                    |                  |       |
| Race/ethnicity                            |                    |                  | <.001 |
| White                                     | 460 (54.4)         | 2491 (68.1)      |       |
| Black                                     | 111 (13.1)         | 240 (6.6)        |       |
| Asian/Pacific Islander                    | 124 (14.7)         | 475 (13.0)       |       |
| Hispanic                                  | 134 (15.9)         | 378 (10.3)       |       |
| American Indian/Alaska Native             | 16 (1.9)           | 76 (2.1)         |       |
| Education                                 |                    |                  | <.001 |
| High school or less                       | 160 (18.9)         | 547 (14.9)       |       |
| Some college                              | 323 (38.2)         | 1245 (34.0)      |       |
| College graduate                          | 217 (25.7)         | 1024 (28.0)      |       |
| Postgraduate                              | 139 (16.4)         | 842 (23.0)       |       |
| Unknown                                   | 6 (0.7)            | 2 (0.1)          |       |
| Menopausal status                         |                    |                  | 0.001 |
| Premenopausal                             | 292 (34.6)         | 1060 (29.0)      |       |
| Postmenopausal                            | 553 (65.4)         | 2600 (71.0)      |       |
| Smoking status                            |                    |                  | <.001 |
| Never                                     | 446 (52.8)         | 2092 (57.2)      |       |
| Former                                    | 315 (37.3)         | 1408 (38.5)      |       |
| Current                                   | 75 (8.9)           | 154 (4.2)        |       |
| Unknown                                   | 9 (1.1)            | 6 (0.2)          |       |
| Cancer stage                              |                    |                  | 0.09  |
| I                                         | 426 (50.4)         | 2008 (54.9)      |       |
| II                                        | 308 (36.4)         | 1250 (34.2)      |       |
| III                                       | 94 (11.1)          | 346 (9.5)        |       |
| IV                                        | 17 (2.0)           | 56 (1.5)         |       |
| ER status                                 |                    |                  | 0.01  |
| Positive                                  | 680 (80.5)         | 3072 (83.9)      |       |
| Negative                                  | 165 (19.5)         | 586 (16.0)       |       |
| Unknown                                   | 0 (0.0)            | 2 (0.1)          |       |
| PR status                                 |                    |                  | 0.08  |
| Positive                                  | 515 (60.9)         | 2347 (64.1)      |       |
| Negative                                  | 330 (39.1)         | 1308 (35.7)      |       |
| Unknown                                   | 0 (0.0)            | 5 (0.1)          |       |
| HER2 status                               |                    |                  | 0.43  |
| Positive                                  | 116 (13.7)         | 472 (12.9)       |       |
| Negative                                  | 685 (81.1)         | 3045 (83.2)      |       |
| Unknown                                   | 44 (5.2)           | 143 (3.9)        |       |
| Recurrence                                |                    |                  | 0.74  |
| No                                        | 735 (87.0)         | 3199 (87.4)      |       |
| Yes                                       | 110 (13.0)         | 461 (12.6)       |       |
| Breast Cancer-Specific Mortality          |                    |                  | 0.57  |
| No                                        | 765 (90.5)         | 3336 (91.1)      |       |
| Yes                                       | 80 (9.5)           | 324 (8.9)        |       |
| Non-Breast Cancer-Specific Mortality      |                    |                  | 0.78  |
| No                                        | 766 (90.7)         | 3329 (91.0)      |       |
| Yes                                       | 79 (9.3)           | 331 (9.0)        |       |
| All-Cause Mortality                       |                    |                  | 0.53  |
| No                                        | 686 (81.2)         | 3005 (82.1)      |       |
| Yes                                       | 159 (18.8)         | 655 (17.9)       |       |

<sup>a</sup>Analysis of variance. Abbreviations: FFQ (food frequency questionnaire), SD (standard deviation), MET (metabolic equivalent of task), ER (estrogen receptor), PR (progesterone receptor), HER2 (human epidermal growth factor receptor 2).

<sup>b</sup>There were 42 participants who did not complete the FFQ and 4 participants who did complete the FFQ with unknown physical activity.

<sup>c</sup>Pearson X<sup>2</sup> test.

Supplementary Table 2. Scoring methods and optimal quantities for each component of ACS, DASH, aMED and HEI.

|                               | ACS<br>(total = 9 points)      | aMED<br>(total = 9 points) | DASH<br>(total = 40 points) | HEI<br>(total = 100 points) |
|-------------------------------|--------------------------------|----------------------------|-----------------------------|-----------------------------|
| <b>Fruits</b>                 |                                |                            |                             |                             |
| Total Fruit                   | —                              | >= Median                  | = Highest quartile          | >= 0.8 cups/1,000 kcal      |
| Whole Fruits                  | —                              | —                          | —                           | >= 0.4 cups/1,000 kcal      |
| <b>Vegetables</b>             |                                |                            |                             |                             |
| Total Vegetables <sup>a</sup> | —                              | >= Median                  | = Highest quartile          | >= 1.1 cups/1,000 kcal      |
| Greens and Beans              | —                              | —                          | —                           | >= 0.2 cups/1,000 kcal      |
| Total Fruits and Vegetables   | = Highest tertile <sup>b</sup> |                            |                             |                             |
| <b>Grains</b>                 |                                |                            |                             |                             |
| Whole Grains                  | = Highest tertile <sup>c</sup> | >= Median                  | = Highest quartile          | > 1.5 ounces/1,000 kcal     |
| Refined Grains                | —                              | —                          | —                           | <= 1.8 ounces/1,000 kcal    |
| <b>Dairy</b>                  |                                |                            |                             |                             |
| Total Dairy                   | —                              | —                          | —                           | >= 1.3 cups/1,000 kcal      |
| Low-fat Dairy                 | —                              | —                          | = Highest quartile          | —                           |
| <b>Protein Foods</b>          |                                |                            |                             |                             |
| Total Protein Foods           | —                              | —                          | —                           | >= 2.5 ounces/1,000 kcal    |
| Seafood and Plant Proteins    | —                              | —                          | —                           | >= 0.8 ounces/1,000 kcal    |
| Red and Processed Meats       | = Lowest tertile               | < Median                   | = Lowest quartile           | —                           |
| Fish                          | —                              | >= Median                  | —                           | —                           |
| Legumes                       | —                              | >= Median                  | —                           | —                           |
| Nuts                          | —                              | >= Median                  | —                           | —                           |
| Nuts and Legumes              | —                              | —                          | = Highest quartile          | —                           |
| <b>Fat</b>                    |                                |                            |                             |                             |
| Unsaturated Fats              | —                              | MUFAs:SFAs >= median       | —                           | PUFAs + MUFAs:SFAs >= 2.5   |
| Saturated Fats                | —                              | —                          | —                           | <= 8% of energy             |
| <b>Sodium</b>                 |                                |                            |                             |                             |
| Sodium                        | —                              | —                          | = Lowest quartile           | <= 1.1 grams/1,000 kcal     |
| <b>Sugar</b>                  |                                |                            |                             |                             |
| Added Sugar                   | —                              | —                          | —                           | <= 6.5% of energy           |
| Sweetened beverages           | —                              | —                          | = Lowest quartile           | —                           |
| <b>Alcohol</b>                |                                |                            |                             |                             |
| Alcohol                       | —                              | 5-15 grams/d               | —                           | —                           |

<sup>a</sup>aMED excludes potatoes; DASH excludes potatoes and legumes. Abbreviations: ACS (American Cancer Society nutrition guidelines score), aMED (Alternate Mediterranean Diet score), DASH (Dietary Approaches to Stop Hypertension score), HEI (2015 Healthy Eating Index score), MUFA (monounsaturated fat), SFA (saturated fat), PUFA (polyunsaturated fat).

<sup>b</sup>Excludes fruit juices and potatoes. Includes partial variety score for consumption of >=5 different fruits or vegetables per month.

<sup>c</sup>Whole grains calculated as a percent of total grains.

Supplementary Table 3. Spearman correlation coefficients among total summary scores for ACS, aMED, DASH and HEI (n=3,660).<sup>a</sup>

|      | ACS  | aMED | DASH | HEI  |
|------|------|------|------|------|
| ACS  | 1.00 | 0.50 | 0.69 | 0.65 |
| aMED |      | 1.00 | 0.66 | 0.59 |
| DASH |      |      | 1.00 | 0.74 |
| HEI  |      |      |      | 1.00 |

<sup>a</sup>All p < 0.001. Abbreviations: ACS (American Cancer Society nutrition guidelines score), aMED (alternate Mediterranean Diet score), DASH (Dietary Approaches to Stop Hypertension score), HEI (Healthy Eating Index score).

Supplementary Figure 1. Causal diagram of the relationship between diet near diagnosis and breast cancer survival.<sup>a</sup>

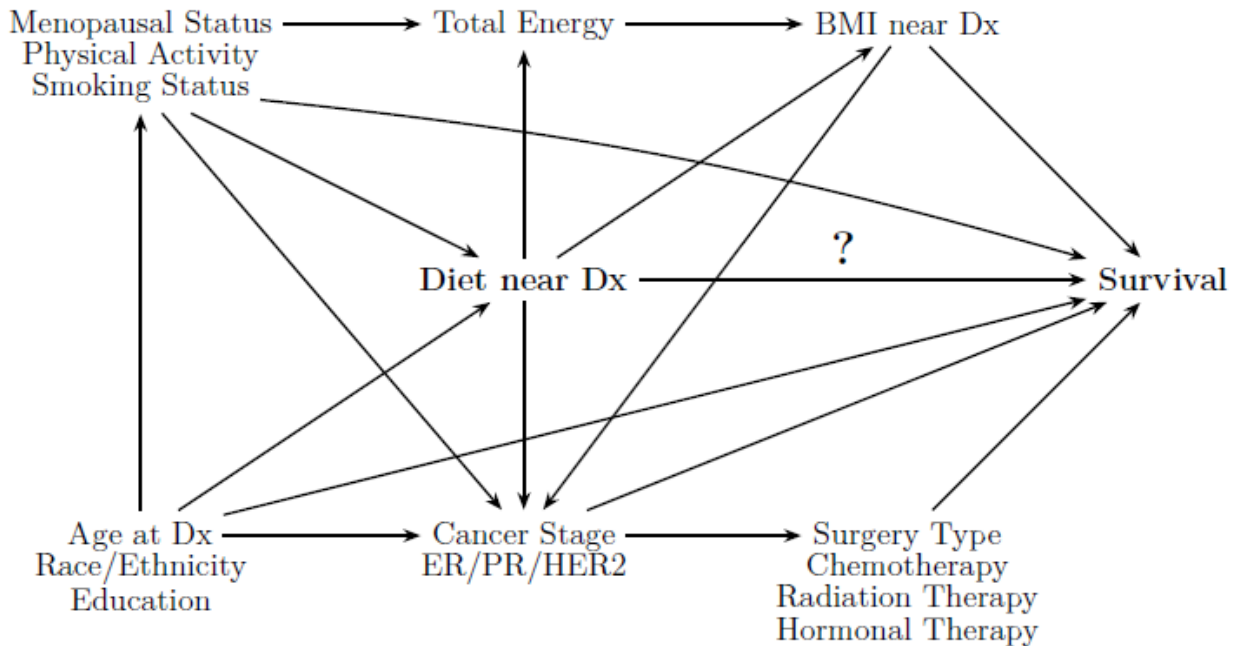

<sup>a</sup>Related variables have been grouped together to simplify presentation.
